# Supplementary material for: Reshaping the Robotic Learning Curve: The Role of Prior Video-Assisted Thoracoscopic Surgery in Anatomic Lung Resection
Source: Research Square preprint supplement (doi:10.21203/rs.3.rs-8052793/v1), 2025-11-21
Supplement: Supplementary file 1 [file c10aec90ef50abc1596433ad.docx]

## Appendix 1. Linear regression analysis for risk-adjusted CUSUM of log transformed operative time - Surgeon A

| Variables | β | Standard error | P-value | 95.0% Confidence Interval | |
| --- | --- | --- | --- | --- | --- |
|  |  |  |  | Lower | Upper |
| (constant) | 4.031 | 0.279 | <0.001 | 3.477 | 4.586 |
| Age | 0.003 | 0.003 | 0.363 | -0.003 | 0.008 |
| Sex | -0.016 | 0.083 | 0.846 | -0.182 | 0.149 |
| smoking | 0.08 | 0.085 | 0.352 | -0.09 | 0.249 |
| Histology II | 0.113 | 0.095 | 0.235 | -0.075 | 0.301 |
| Histology III | -0.011 | 0.094 | 0.911 | -0.198 | 0.177 |
| Surgery extent | -0.064 | 0.069 | 0.361 | -0.202 | 0.074 |
| Port number | 0.225 | 0.084 | 0.009 | 0.058 | 0.391 |
| Pathologic stage II | 0.01 | 0.071 | 0.887 | -0.131 | 0.151 |
| Pathologic stage III | 0.088 | 0.077 | 0.257 | -0.065 | 0.242 |
| Pathologic stage IV | 0.245 | 0.135 | 0.072 | -0.023 | 0.513 |
| Neoadjuvant treatment | 0.106 | 0.234 | 0.653 | -0.36 | 0.572 |
| Combined operation | 0.195 | 0.105 | 0.068 | -0.015 | 0.405 |

## Appendix 2. Linear regression analysis for risk-adjusted CUSUM of log transformed operative time - Surgeon B

| Variables | β | Standard error | P-value | 95.0% Confidence Interval | |
| --- | --- | --- | --- | --- | --- |
|  |  |  |  | Lower | Upper |
| (constant) | 5.332 | 0.261 | <0.001 | 4.815 | 5.849 |
| Age | <0.001 | 0.002 | 0.826 | -0.004 | 0.004 |
| Sex | -0.018 | 0.048 | 0.7 | -0.113 | 0.076 |
| smoking | 0.097 | 0.049 | 0.051 | <0.001 | 0.194 |
| Histology II | -0.01 | 0.065 | 0.873 | -0.14 | 0.119 |
| Histology III | 0.075 | 0.101 | 0.459 | -0.125 | 0.276 |
| Surgery extent | -0.009 | 0.056 | 0.867 | -0.12 | 0.102 |
| Port number | -0.095 | 0.065 | 0.147 | -0.223 | 0.034 |
| Pathologic stage II | -0.002 | 0.062 | 0.971 | -0.126 | 0.121 |
| Pathologic stage III | 0.074 | 0.044 | 0.095 | -0.013 | 0.16 |
| Pathologic stage IV | -0.204 | 0.103 | 0.049 | -0.407 | <0.001 |
| Combined operation | 0.061 | 0.048 | 0.209 | -0.035 | 0.157 |

Neoadjuvant therapy was excluded from Surgeon B’s model due to the absence of treated cases in this group.

## Appendix 3. Linear regression analysis for risk-adjusted CUSUM of log transformed operative time - Surgeon C

| Variables | β | Standard error | P-value | 95.0% Confidence Interval | |
| --- | --- | --- | --- | --- | --- |
|  |  |  |  | Lower | Upper |
| (constant) | 5.297 | 0.202 | <0.001 | 4.895 | 5.698 |
| Age | -0.007 | 0.003 | 0.023 | -0.013 | <0.001 |
| Sex | -0.032 | 0.087 | 0.716 | -0.205 | 0.141 |
| smoking | 0.068 | 0.087 | 0.433 | -0.104 | 0.241 |
| Histology II | 0.153 | 0.102 | 0.139 | -0.051 | 0.357 |
| Histology III | 0.026 | 0.124 | 0.834 | -0.221 | 0.273 |
| Surgery extent | -0.018 | 0.06 | 0.764 | -0.137 | 0.101 |
| Port number | 0.022 | 0.021 | 0.292 | -0.019 | 0.064 |
| Pathologic stage II | -0.183 | 0.079 | 0.022 | -0.34 | -0.026 |
| Pathologic stage III | -0.114 | 0.072 | 0.117 | -0.258 | 0.029 |
| Pathologic stage IV | -0.156 | 0.141 | 0.271 | -0.436 | 0.124 |
| Neoadjuvant treatment | 0.046 | 0.138 | 0.742 | -0.229 | 0.32 |
| Combined operation | -0.019 | 0.079 | 0.806 | -0.177 | 0.138 |

## Appendix 4. Logistic regression analysis for risk-adjusted CUSUM – Complication of Surgeon A

| Variables | β | Standard error | P-value | 95.0% Confidence Interval | |
| --- | --- | --- | --- | --- | --- |
|  |  |  |  | Lower | Upper |
| (constant) | -7.019 | 6.528 | 0.282 | -20.61 | 3.892 |
| Age | 0.088 | 0.058 | 0.131 | -0.017 | 0.213 |
| Sex | 0.565 | 1.43 | 0.693 | -2.868 | 3.14 |
| smoking | 1.26 | 1.369 | 0.357 | -1.061 | 4.675 |
| Histology II | 0.112 | 1.036 | 0.914 | -2.133 | 2.092 |
| Histology III | -17.989 | 3399.21 | 0.996 | nan | 315.287 |
| Surgery extent | -1.595 | 1.319 | 0.227 | -4.927 | 0.598 |
| Port number | -0.366 | 1.806 | 0.839 | -3.732 | 2.846 |
| Pathologic stage II | -0.351 | 0.96 | 0.714 | -2.49 | 1.412 |
| Pathologic stage III | -0.402 | 1.286 | 0.754 | -3.587 | 1.872 |
| Pathologic stage IV | 1.481 | 1.485 | 0.319 | -1.922 | 4.33 |
| Neoadjuvant treatment | -16.3 | 10754.013 | 0.999 | nan | 1824.287 |
| Combined operation | -16.612 | 3639.111 | 0.996 | nan | 219.64 |

## Appendix 5. Logistic regression analysis for risk-adjusted CUSUM – Complication of Surgeon B

| Variables | β | Standard error | P-value | 95.0% Confidence Interval | |
| --- | --- | --- | --- | --- | --- |
|  |  |  |  | Lower | Upper |
| (constant) | -2.887 | 5.451 | 0.596 | -16.265 | 6.28 |
| Age | 0.049 | 0.048 | 0.311 | -0.04 | 0.152 |
| Sex | -1.214 | 1.056 | 0.25 | -3.4 | 0.753 |
| smoking | 0.815 | 1.047 | 0.437 | -1.224 | 2.888 |
| Histology II | -16.247 | 1851.371 | 0.993 | nan | 148.173 |
| Histology III | -15.919 | 3077.069 | 0.996 | nan | 290.251 |
| Surgery extent | 0.251 | 1.214 | 0.836 | -2.838 | 2.373 |
| Port number | -0.715 | 1.241 | 0.565 | -2.945 | 2.393 |
| Pathologic stage II | 0.43 | 1.228 | 0.726 | -2.668 | 2.603 |
| Pathologic stage III | 0.678 | 0.965 | 0.482 | -1.44 | 2.533 |
| Pathologic stage IV | 1.97 | 1.461 | 0.178 | -1.426 | 4.758 |
| Combined operation | -0.292 | 1.17 | 0.803 | -3.331 | 1.694 |

Neoadjuvant therapy was excluded from Surgeon B’s model due to the absence of treated cases in this group.

## Appendix 6 Logistic regression analysis for risk-adjusted CUSUM – Complication of Surgeon C

| Variables | β | Standard error | P-value | 95.0% Confidence Interval | |
| --- | --- | --- | --- | --- | --- |
|  |  |  |  | Lower | Upper |
| (constant) | -4.52 | 3.844 | 0.24 | -13.075 | 2.252 |
| Age | 0.018 | 0.053 | 0.737 | -0.08 | 0.132 |
| Sex | 0.957 | 1.817 | 0.598 | -2.278 | 4.641 |
| smoking | 0.807 | 1.719 | 0.639 | -2.25 | 4.163 |
| Histology II | 0.373 | 1.434 | 0.795 | -2.944 | 3.168 |
| Histology III | 1.5 | 1.441 | 0.298 | -1.824 | 4.321 |
| Surgery extent | -1.933 | 1.422 | 0.174 | -5.419 | 0.399 |
| Port number | -0.136 | 0.411 | 0.74 | -0.968 | 0.749 |
| Pathologic stage II | -1.22 | 1.544 | 0.429 | -4.966 | 1.388 |
| Pathologic stage III | 0.791 | 1.301 | 0.543 | -2.37 | 3.269 |
| Pathologic stage IV | -20.093 | 2585.97 | 0.994 | nan | 263.154 |
| Neoadjuvant treatment | 3.158 | 1.711 | 0.065 | -0.463 | 6.789 |
| Combined operation | 2.635 | 1.302 | 0.043 | 0.112 | 5.481 |

## Appendix 7. Linear regression analysis for risk-adjusted CUSUM of log transformed harvested lymph nodes - Surgeon A

| Variables | β | Standard error | P-value | 95.0% Confidence Interval | |
| --- | --- | --- | --- | --- | --- |
|  |  |  |  | Lower | Upper |
| (constant) | 3.283 | 0.518 | <0.001 | 2.252 | 4.313 |
| Age | -0.004 | 0.005 | 0.403 | -0.014 | 0.006 |
| Sex | 0.093 | 0.155 | 0.549 | -0.214 | 0.4 |
| smoking | -0.023 | 0.158 | 0.887 | -0.337 | 0.292 |
| Histology II | 0.146 | 0.176 | 0.407 | -0.203 | 0.496 |
| Histology III | -0.256 | 0.175 | 0.149 | -0.604 | 0.093 |
| Surgery extent | -0.12 | 0.129 | 0.354 | -0.377 | 0.136 |
| Port number | 0.072 | 0.156 | 0.643 | -0.237 | 0.382 |
| Pathologic stage II | 0.112 | 0.132 | 0.397 | -0.15 | 0.374 |
| Pathologic stage III | -0.021 | 0.144 | 0.883 | -0.307 | 0.264 |
| Pathologic stage IV | 0.04 | 0.25 | 0.872 | -0.457 | 0.538 |
| Neoadjuvant treatment | -0.044 | 0.436 | 0.92 | -0.91 | 0.822 |
| Combined operation | 0.081 | 0.196 | 0.68 | -0.308 | 0.471 |

## Appendix 8. Linear regression analysis for risk-adjusted CUSUM of log transformed harvested lymph nodes - Surgeon B

| Variables | β | Standard error | P-value | 95.0% Confidence Interval | |
| --- | --- | --- | --- | --- | --- |
|  |  |  |  | Lower | Upper |
| (constant) | 2.918 | 0.446 | <0.001 | 2.035 | 3.801 |
| Age | 0.002 | 0.003 | 0.555 | -0.005 | 0.009 |
| Sex | -0.1 | 0.081 | 0.223 | -0.261 | 0.061 |
| smoking | 0.093 | 0.084 | 0.269 | -0.073 | 0.259 |
| Histology II | 0.322 | 0.112 | 0.005 | 0.102 | 0.543 |
| Histology III | 0.311 | 0.173 | 0.075 | -0.032 | 0.653 |
| Surgery extent | -0.222 | 0.096 | 0.022 | -0.411 | -0.032 |
| Port number | 0.061 | 0.111 | 0.585 | -0.158 | 0.279 |
| Pathologic stage II | -0.168 | 0.107 | 0.117 | -0.379 | 0.043 |
| Pathologic stage III | 0.085 | 0.075 | 0.256 | -0.063 | 0.233 |
| Pathologic stage IV | 0.086 | 0.175 | 0.623 | -0.26 | 0.433 |
| Combined operation | 0.095 | 0.082 | 0.254 | -0.069 | 0.258 |

Neoadjuvant therapy was excluded from Surgeon B’s model due to the absence of treated cases in this group.

## Appendix 9. Linear regression analysis for risk-adjusted CUSUM of log transformed harvested lymph nodes - Surgeon C

| Variables | β | Standard error | P-value | 95.0% Confidence Interval | |
| --- | --- | --- | --- | --- | --- |
|  |  |  |  | Lower | Upper |
| (constant) | 2.64 | 0.317 | <0.001 | 2.011 | 3.27 |
| Age | 0.008 | 0.005 | 0.092 | -0.001 | 0.017 |
| Sex | -0.133 | 0.136 | 0.334 | -0.404 | 0.139 |
| smoking | 0.239 | 0.136 | 0.082 | -0.031 | 0.509 |
| Histology II | -0.38 | 0.16 | 0.02 | -0.699 | -0.062 |
| Histology III | -0.042 | 0.195 | 0.83 | -0.429 | 0.345 |
| Surgery extent | -0.175 | 0.094 | 0.065 | -0.362 | 0.011 |
| Port number | 0.021 | 0.033 | 0.517 | -0.044 | 0.087 |
| Pathologic stage II | 0.044 | 0.124 | 0.72 | -0.201 | 0.29 |
| Pathologic stage III | 0.14 | 0.113 | 0.218 | -0.084 | 0.365 |
| Pathologic stage IV | -0.178 | 0.221 | 0.423 | -0.616 | 0.261 |
| Neoadjuvant treatment | 0.036 | 0.216 | 0.87 | -0.394 | 0.465 |
| Combined operation | 0.259 | 0.124 | 0.04 | 0.012 | 0.505 |

## Appendix 10. Linear regression analysis for risk-adjusted CUSUM of log transformed length of hospital stay - Surgeon A

| Variables | β | Standard error | P-value | 95.0% Confidence Interval | |
| --- | --- | --- | --- | --- | --- |
|  |  |  |  | Lower | Upper |
| (constant) | 1.941 | 0.413 | <0.001 | 1.12 | 2.762 |
| Age | <0.001 | 0.004 | 0.944 | -0.008 | 0.008 |
| Sex | 0.044 | 0.123 | 0.722 | -0.201 | 0.289 |
| smoking | 0.089 | 0.126 | 0.483 | -0.162 | 0.34 |
| Histology II | 0.007 | 0.14 | 0.96 | -0.271 | 0.285 |
| Histology III | -0.182 | 0.14 | 0.196 | -0.46 | 0.096 |
| Surgery extent | <0.001 | 0.103 | 0.999 | -0.204 | 0.204 |
| Port number | -0.124 | 0.124 | 0.319 | -0.371 | 0.122 |
| Pathologic stage II | 0.096 | 0.105 | 0.364 | -0.113 | 0.304 |
| Pathologic stage III | 0.202 | 0.114 | 0.081 | -0.025 | 0.429 |
| Pathologic stage IV | 0.12 | 0.199 | 0.548 | -0.276 | 0.517 |
| Neoadjuvant treatment | 0.292 | 0.347 | 0.402 | -0.398 | 0.982 |
| Combined operation | -0.032 | 0.156 | 0.84 | -0.342 | 0.279 |

## Appendix 11. Linear regression analysis for risk-adjusted CUSUM of log transformed length of hospital stay - Surgeon B

| Variables | β | Standard error | P-value | 95.0% Confidence Interval | |
| --- | --- | --- | --- | --- | --- |
|  |  |  |  | Lower | Upper |
| (constant) | 1.91 | 0.399 | <0.001 | 1.121 | 2.7 |
| Age | -0.002 | 0.003 | 0.429 | -0.008 | 0.004 |
| Sex | 0.16 | 0.073 | 0.029 | 0.016 | 0.304 |
| smoking | -0.056 | 0.075 | 0.457 | -0.204 | 0.092 |
| Histology II | 0.011 | 0.1 | 0.916 | -0.187 | 0.208 |
| Histology III | -0.084 | 0.155 | 0.587 | -0.391 | 0.222 |
| Surgery extent | 0.018 | 0.086 | 0.834 | -0.151 | 0.187 |
| Port number | -0.035 | 0.099 | 0.723 | -0.231 | 0.161 |
| Pathologic stage II | 0.076 | 0.095 | 0.426 | -0.113 | 0.265 |
| Pathologic stage III | -0.018 | 0.067 | 0.79 | -0.15 | 0.114 |
| Pathologic stage IV | 0.207 | 0.157 | 0.188 | -0.103 | 0.517 |
| Combined operation | 0.037 | 0.074 | 0.613 | -0.109 | 0.183 |

Neoadjuvant therapy was excluded from Surgeon B’s model due to the absence of treated cases in this group.

## Appendix 12. Linear regression analysis for risk-adjusted CUSUM of log transformed length of hospital stay - Surgeon C

| Variables | β | Standard error | P-value | 95.0% Confidence Interval | |
| --- | --- | --- | --- | --- | --- |
|  |  |  |  | Lower | Upper |
| (constant) | 1.435 | 0.259 | <0.001 | 0.92 | 1.951 |
| Age | 0.003 | 0.004 | 0.422 | -0.004 | 0.011 |
| Sex | 0.028 | 0.112 | 0.802 | -0.194 | 0.25 |
| smoking | 0.05 | 0.111 | 0.656 | -0.171 | 0.271 |
| Histology II | 0.039 | 0.131 | 0.769 | -0.222 | 0.3 |
| Histology III | 0.375 | 0.159 | 0.021 | 0.058 | 0.691 |
| Surgery extent | -0.096 | 0.077 | 0.217 | -0.249 | 0.057 |
| Port number | 0.007 | 0.027 | 0.806 | -0.047 | 0.06 |
| Pathologic stage II | -0.084 | 0.101 | 0.409 | -0.285 | 0.117 |
| Pathologic stage III | -0.116 | 0.092 | 0.213 | -0.3 | 0.068 |
| Pathologic stage IV | -0.068 | 0.181 | 0.707 | -0.427 | 0.291 |
| Neoadjuvant treatment | -0.281 | 0.177 | 0.116 | -0.633 | 0.071 |
| Combined operation | 0.092 | 0.101 | 0.365 | -0.109 | 0.294 |
